# Supplementary material
Source: PubMed Central journal article supplement (PMC8581027)
Supplement: 41386_2021_1139_MOESM1_ESM.pdf [file 41386_2021_1139_MOESM1_ESM.pdf]

## **Supplementary Information for**

**“Astrocyte-derived TNF and glutamate critically modulate microglia activation by methamphetamine”** by Canedo et al.

### **Contents within the present file**

#### **1. Supplementary methods**

#### **2. Supplementary Figures and Legends:**

Suppl. Fig 1 and respective legend

Suppl. Fig 2 and respective legend

Suppl. Fig 3 and respective legend

Suppl. Fig 4 and respective legend

Suppl. Fig 5 and respective legend

#### **3. Supplementary Tables:**

Suppl. Table 4 - Antibodies used for immunohistochemistry

Suppl. Table 5 - Antibodies used for immunocytochemistry

Suppl. Table 6 - Primer sequences used in qRT-PCR

Suppl. Table 7 - Genes overlapping between published gene sets and enriched genes in microglia Meth vs Saline

#### **4. Supplementary References**

### **Guide for Other Supplementary materials (available as individual files):**

**Suppl. Table 1** – Genes enriched in microglia Meth vs Saline (Data Set).

**Suppl. Table 2** – List of all genes identified in microglia Meth vs Saline (Data Set).

**Suppl. Table 3** – GSEA data (Data Set).

**Suppl. Video 1** – Primary astrocytes from WT mice expressing the glutamate release FRET biosensor (FLIPE) exposed to Meth 100 $\mu$ M (support Fig. 3B and Supp. Fig 4D).

**Suppl. Video 2** - Primary astrocytes from TNF KO mice expressing the glutamate release FRET biosensor (FLIPE) exposed to Meth 100 $\mu$ M (support Fig. 3B and Supp. Fig 4D).

## 1. Supplementary methods

### Bioinformatical Analysis of Microglial RNA sequencing

Data from the S5 XL run processed using the Ion Torrent platform specific pipeline software Torrent Suite v5.12 to generate sequence reads, trim adapter sequences, filter and remove poor signal reads, and split the reads according to the barcode. FASTQ and/or BAM files were generated using the Torrent Suit plugin FileExporter v5.12. Automated data analysis was done with Torrent Suite™ Software using the Ion AmpliSeq™ RNA plug-in v.5.12 and target region AmpliSeq\_Mouse\_Transcriptome\_V1\_Designed.

Raw data was loaded into the Transcriptome Analysis Console (4.0 Thermo Fisher Scientific, MA, USA) and first filtered based on ANOVA eBayes using Limma package, applied to fold changes  $\leq -1.5$  or  $\geq 1.5$  between experimental and control conditions. Significant changes had a  $p$  value  $<0.05$  and a false discovery rate  $<0.2$ . Genes that were significantly downregulated or upregulated by Meth in microglia, following the described criteria, are listed in **Supp. Table 1**.

RNA-seq functional enrichment analysis using Gene Set Enrichment Analysis (GSEA) was performed by WEB-based Gene SeT AnaLysis Toolkit (WebGestalt) [81]. All detectable genes (**Supp. Table 2**) with their corresponding fold-change values were submitted to WebGestalt at <http://www.webgestalt.org>. GSEA was performed using the open-access available platforms, Wikipathways, KEGG and REACTOME with default settings. Enrichment scores for gene sets were calculated using an FDR cutoff of 0.05 and hypergeometric overlap analysis (**Supp. Table 3**). Genes retrieved from GSEA datasets were used for constructing a protein-protein interaction network. Such network was generated using Omics Visualizer [82] and String applications [83] in Cytoscape.

### Cell viability assay

Cells were fixed with 4% PFA for 10 min and then stained with 1  $\mu\text{g/ml}$  Hoechst 33342 (Sigma-Aldrich) for 30 min at 37 °C. After wash, cells were observed using a DMI6000B inverted microscope (Leica Microsystems) with an HCX Plan Apo 63x/1.3 NA glycerol immersion objective. Images were acquired with 4x4 binning using a digital CMOS camera (ORCA-Flash4.0 V2, Hamamatsu Photonics). For quantification cells with condensed or fragmented nuclei were defined as dead cells.

### Automated fluorescence imaging and quantification

Primary microglial cells were seeded on 96-well plate (CellCarrier, PerkinElmer, MA, USA) at  $1 \times 10^4$  cells/well using an automated Multidrop dispenser (Thermo Scientific). Twenty-four hours after glutamate or ACM exposure, microglial cells were washed and fixed with 4% PFA

(w/v). Cells were then permeabilized with 0.25% (v/v) Triton X-100 for 10 min at room temperature and incubated with primary antibody (**Suppl. Table 5**) for 24h at 4°C. After washes, secondary antibodies conjugated with Alexa Fluor 568 were incubated for 1h (RT). Antibodies were described in **Suppl. Table 5**. Hoechst (0,5 µg/mL) and HCS CellMask (Invitrogen) were incubated for 30min (RT).

Images of microglial cultures were acquired in INCell Analyzer 2000 microscope (GE Healthcare, IL, USA) using a large chip CCD Camera (binning 2X2) and a Nikon 40x/0.95 NA Plan Fluor objective. Image analysis was performed using the CellProfiler (4.2.0) program. Briefly, the image analysis workflow consists in the segmentation of the nuclei, using the Hoechst channel followed by Otsu local thresholding. Afterward, microglial cells were segmented using the raw HCS CellMask image through a propagation algorithm based on the minimum cross entropy thresholding method applied to the HCS CellMask channel. The mean pixel intensity of the interest channels in each individual cell were extracted and plotted for evaluation.

## **2. Supplementary Figures and Legends**

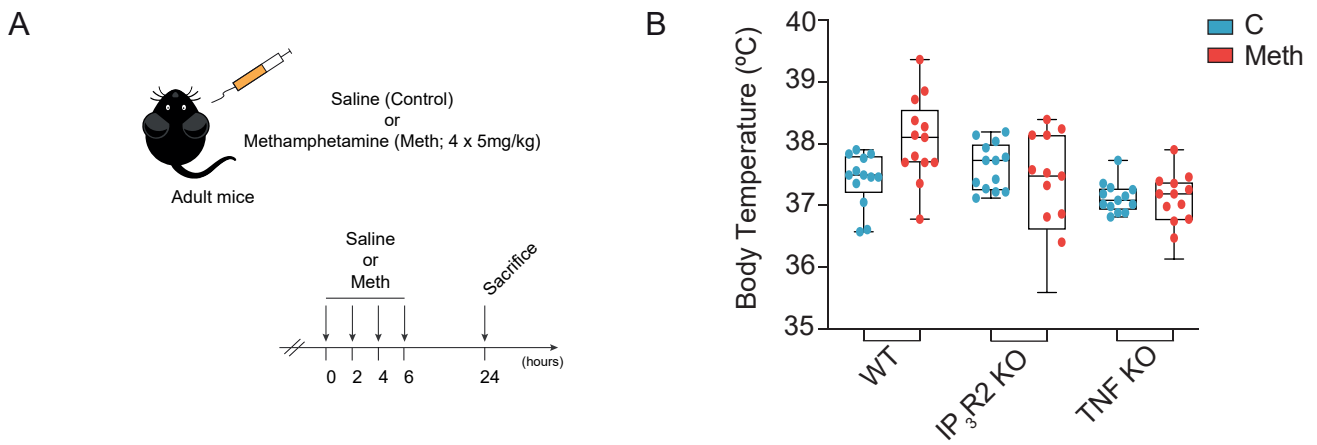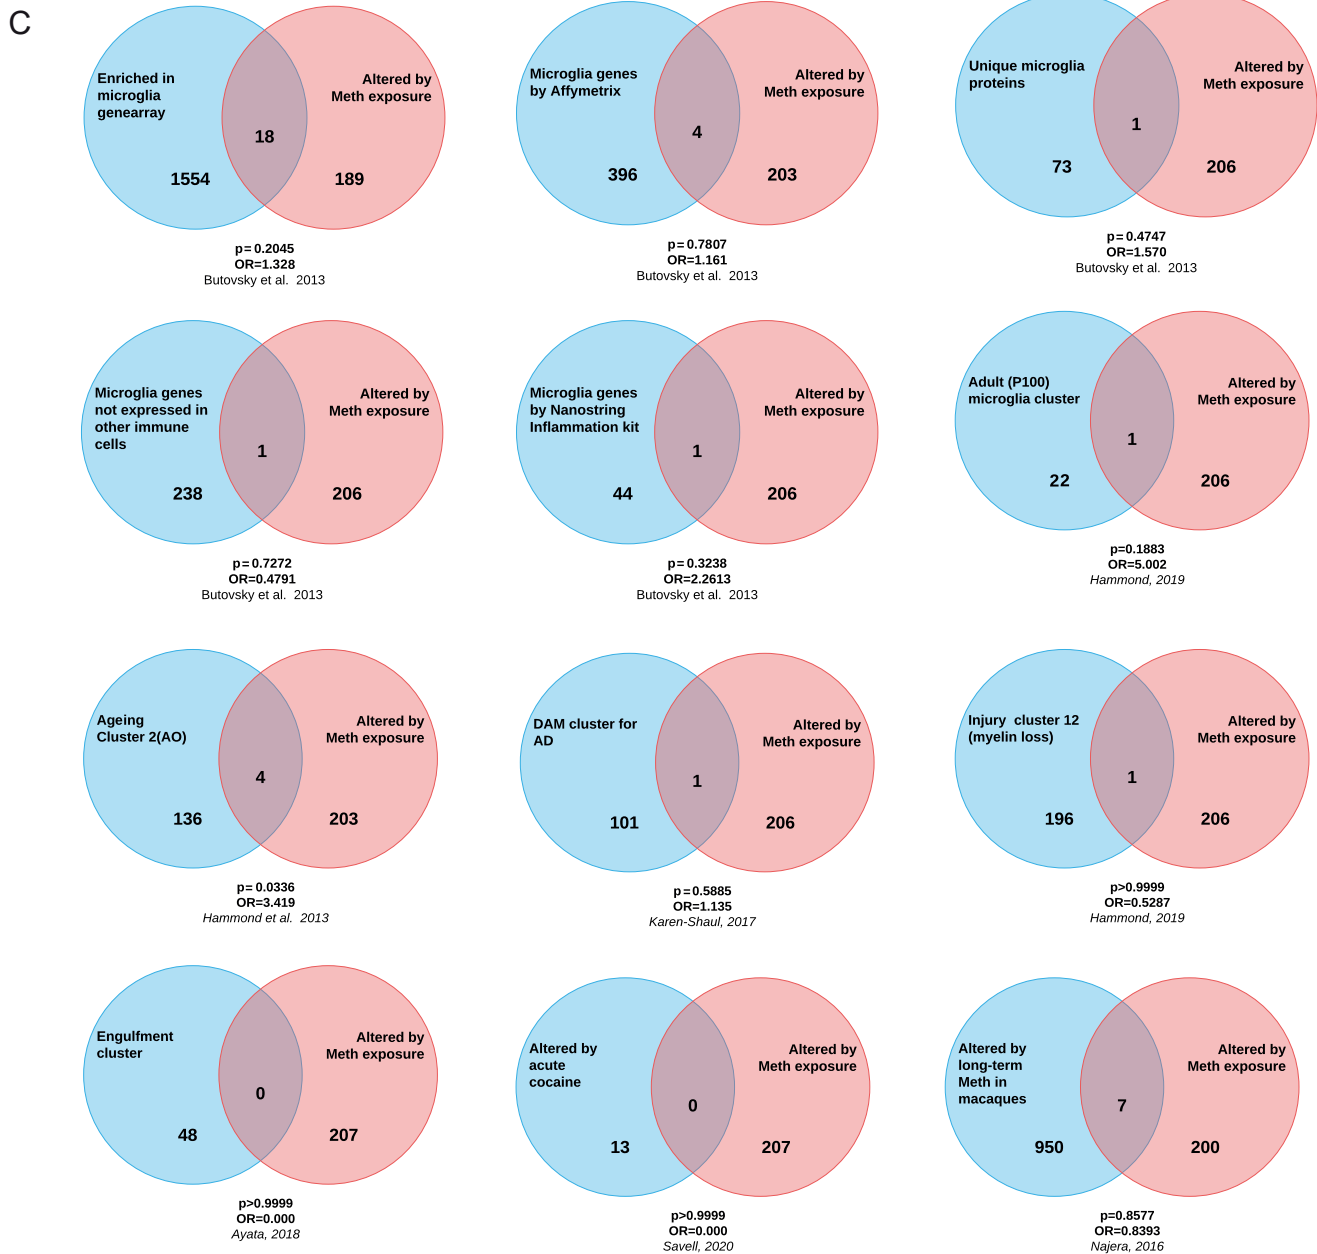

Suppl. Fig. 1

## Supplementary Figure 1.

**A:** Schematic representation of binge Meth administration.

**B:** WT, IP<sub>3</sub>R2 KO, and TNF KO mice were administered saline (CT) or Meth. The whisker plots represent the median (line within the box), maximum (top whisker) and minimum (bottom whisker) values of mice's body temperature during the Meth administration protocol. Temperatures were evaluated at 13 time points, each point represents the mean temperature (n=3 animals *per* group) for one timepoint.

**C:** Venn's diagrams representing cluster analysis comparing the 207 Meth-altered genes cluster found in our RNA-seq analysis, with clusters previously reported for healthy[4,5], aging[6], disease-associated (DAM)[7], injured[6], drug exposed microglia[8,9], or with clusters previously associated to specific microglia functions[4]. Comparisons were conducted by contingency analysis, using the Fisher's exact test and the Baptista-Pike method to calculate the odds-ratio. Significance was set at p<0.05. A comprehensive list of the shared genes in each case is available in **Suppl. Table 7**.

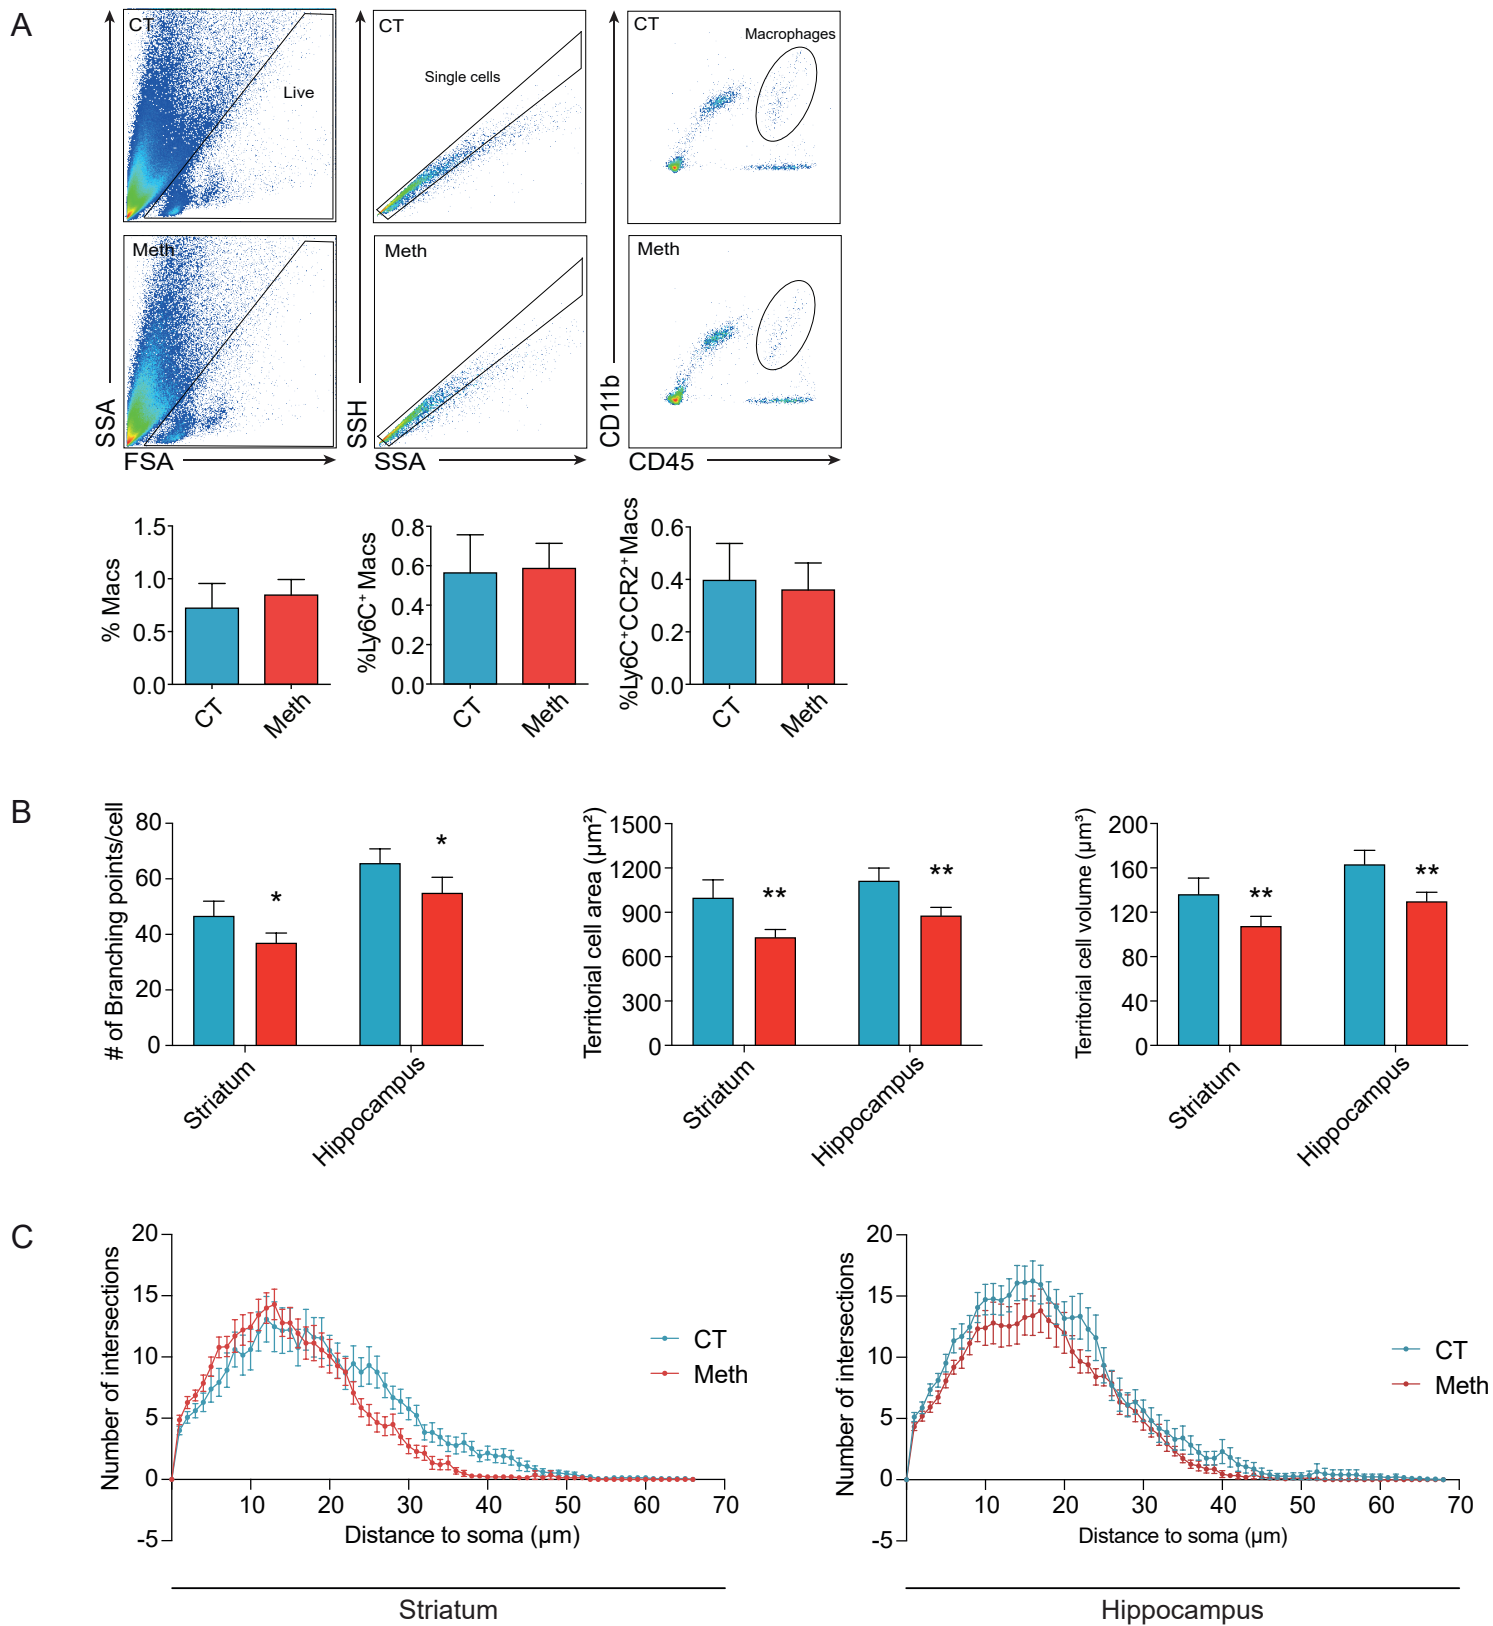

Suppl. Fig. 2

## Supplementary Figure 2.

**A:** Flow cytometry analyses of macrophages (CD11b<sup>+</sup> CD45<sup>high</sup>) isolated from the brains of mice injected with binge Meth or saline (CT) (n=5 animals *per* group). Graphs display with mean and SEM of the percentage of macrophages, the percentage of macrophages expressing activation markers such as Ly6C<sup>+</sup> and Ly6C<sup>+</sup>CCR2<sup>+</sup>.

**B:** Morphological analyses of microglia from striatal or hippocampal sections from mice administered with binge Meth or saline (CT). Graphs display (mean and SEM) of Imaris-based automated quantification for the number of branching points, territorial cell area and territorial cell volume (13-17 cells/group from n=3 mice *per* group). \*p<0.05, \*\*p<0.001 (unpaired t test). Two-way ANOVA (treatment x region) revealing also a significant effect for region (p<0.05) for branching points (p<0.001) and territorial volume (p<0.05), followed by the two-stage linear step-up procedure of Benjamini, Krieger and Yekutieli.

**C:** Sholl analysis of microglia from striatal or hippocampal sections from mice administered with binge Meth or saline (CT) (13-17 cells/group from n=3 mice *per* group). Two-way ANOVA revealing significant effects for treatment and distance to soma: striatum (p<0.001, p<0.0001), hippocampus (p<0.0001, p<0.0001), but no interaction between factors.



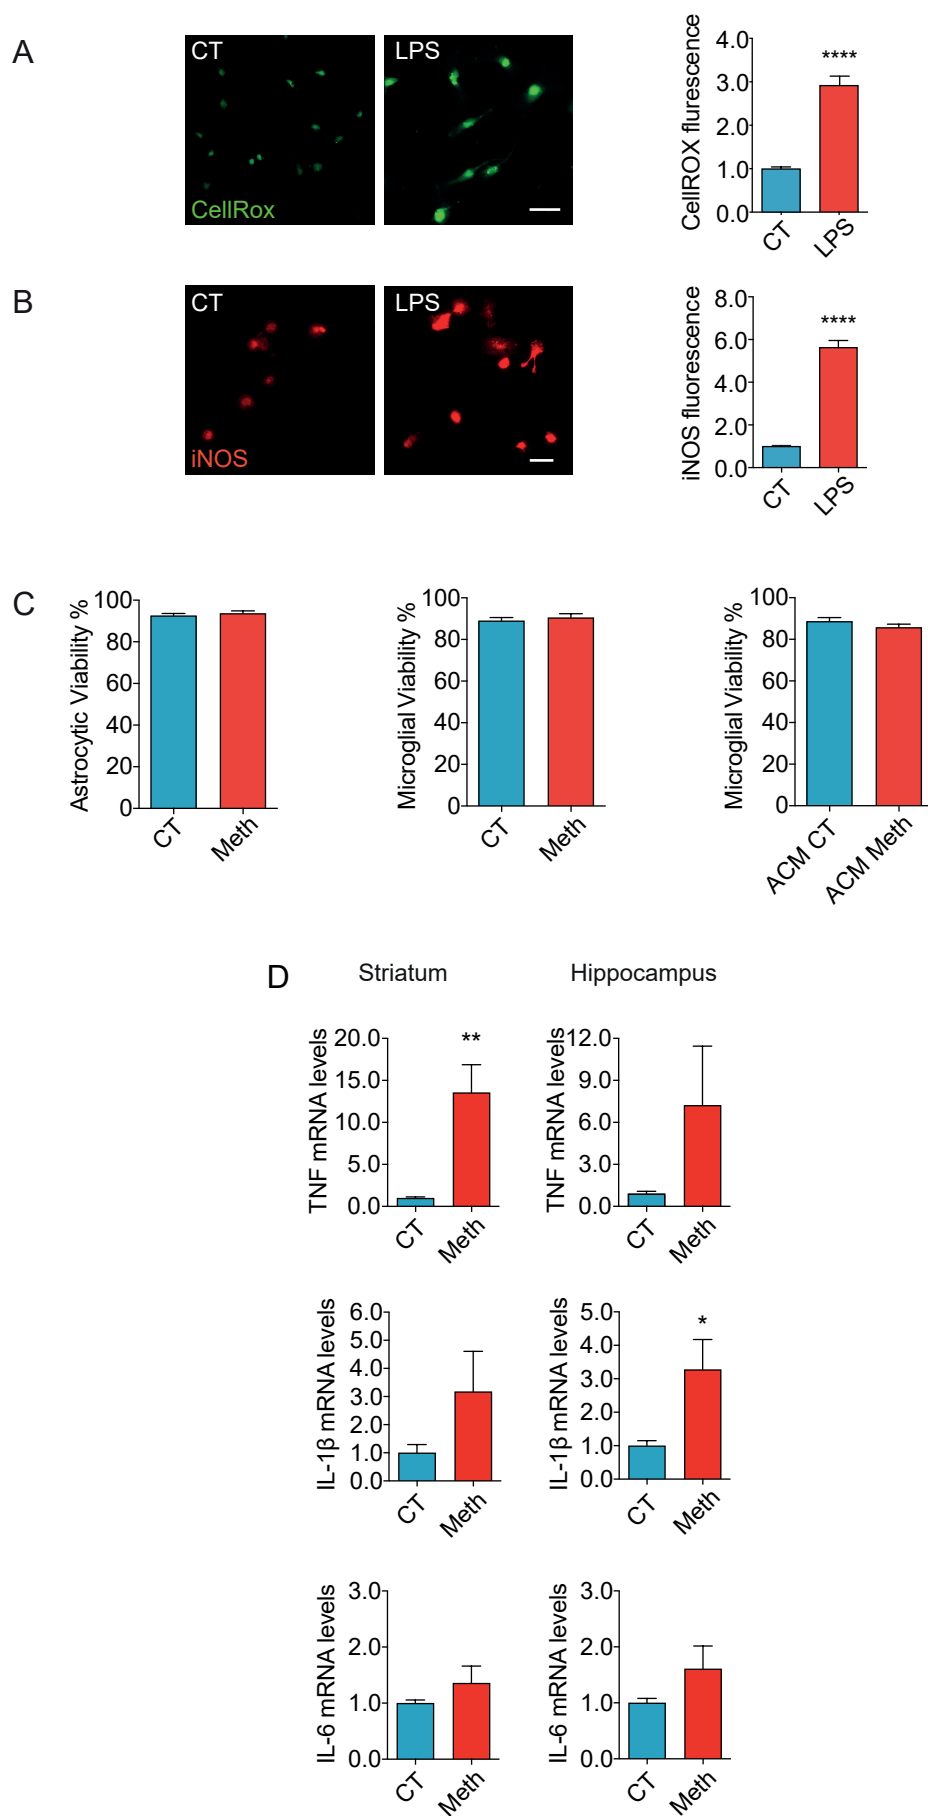

### Supplementary Figure 3.

**A:** Primary microglia cells incubated with the CellRox<sup>®</sup> green reagent and treated with 1µg/mL LPS for 24h (n=3 independent cultures). Graph (means and SEM) displays the CellRox<sup>®</sup> intensity normalized to the control values. \*\*\*\*p<0.0001 (unpaired t-test). Scale bar 10µm.

**B:** Fluorescence imaging of primary microglia immunolabeled for iNOS treated with 1µg/mL LPS for 24h (n=3 independent cultures). Graph (means and SEM) displays iNOS intensity normalized to the Control values. \*\*\*\*p<0.0001 (unpaired t test). Scale bar 10µm.

**C:** Viability of astrocytes were examined by Hoechst staining under 100µM Meth. Graphs represent (means and SEM) the percentage of astrocyte or microglia viability upon Meth exposure compared to control (CT) condition, and percentage of viability for microglia upon ACM Meth exposure compared to the control condition (ACM CT).

**D:** qRT-PCR for TNF, IL-1β and IL-6 from the striatum or hippocampus of WT mice administered with saline or Meth (n=5 mice *per* group). Graphs (means and SEM) display the mRNA levels of indicated transcripts. \*p<0.05 and \*\*p<0.01 (unpaired t-test).

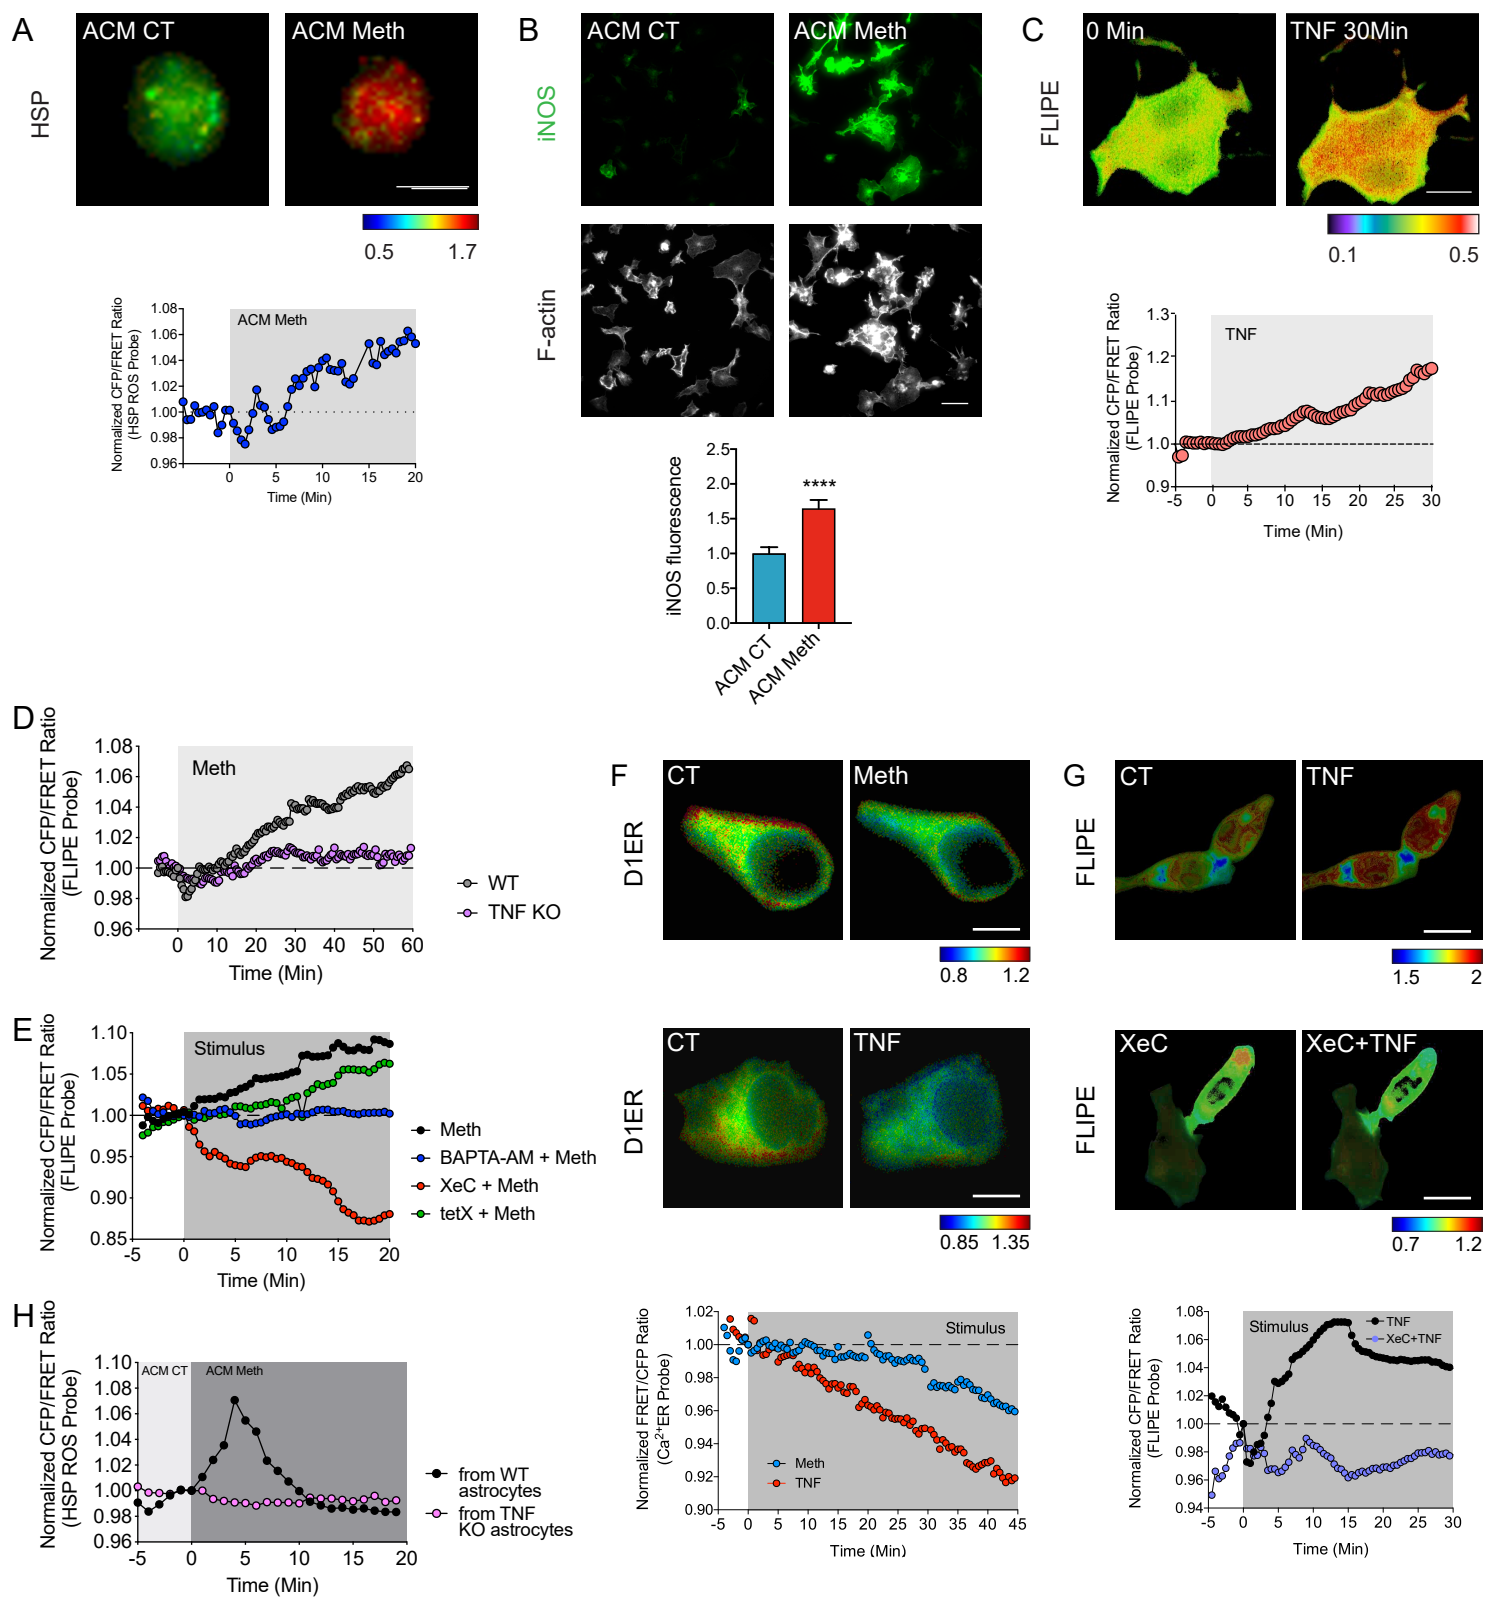

Suppl. Fig. 4

#### Supplementary Figure 4.

**A:** Primary microglia expressing the ROS FRET biosensor (HSP) were incubated with ACM CT (left panel) and then exposed to ACM Meth (right panel). Time-lapses of CFP/FRET ratio changes for the HSP biosensor (normalized at 0 min) are shown according to the scale (n=4 cells pooled across 2 independent experiments). Scale bars 10 $\mu$ m.

**B:** Fluorescence imaging of primary microglia immunolabeled for iNOS (green) and F-actin (grey; labeled with Alexa Fluor 647 Phalloidin obtained from Thermo Scientific) and treated with ACM CT or ACM Meth for 24h (n=3 independent experiments). Graph (means and SEM) displays iNOS intensity normalized to the ACM CT. \*\*\*\*p<0.0001 (unpaired t-test). Scale bar 10 $\mu$ m.

**C:** Primary astrocytes expressing the glutamate release FRET biosensor (FLIPE) were exposed to TNF (50nM). Time-lapses of CFP/FRET ratio changes for the FLIPE biosensor (normalized at 0 min) are shown according to the scale (n=6 cells pooled across 2 independent experiments). Scale bars 10 $\mu$ m.

**D:** Time-lapses of CFP/FRET ratio changes for the FLIPE biosensor (normalized at 0 min) for the glutamate release illustrated in Fig. 3B shown according to the scale (n=3-8 cells pooled across 2-3 independent experiments).

**E:** Time-lapses of CFP/FRET ratio changes for the FLIPE biosensor (normalized at 0 min) for the glutamate release experiments illustrated in Fig. 3C shown according to the scale (n=5-7 cells pooled across 3 independent experiments).

**F:** Primary astrocytes expressing the endoplasmic reticulum calcium release FRET biosensor (D1ER) were exposed to Meth (100 $\mu$ M) (upper panels; blue circles) or TNF (50nM) (bottom panels; red circles). Time-lapses of CFP/FRET ratio changes for the D1ER biosensor (normalized at 0 min) are shown according to the scale (n=3-4 cells pooled across 2-3 independent experiments). Scale bars, 10 $\mu$ m.

**G:** Primary astrocytes expressing the glutamate release FRET biosensor (FLIPE) were exposed to TNF (50nM) (upper panels; black circles) or Xestosponginc (500nM) + TNF (50nM) (bottom panels; lilac circles). Time-lapses of CFP/FRET ratio changes for the FLIPE biosensor (normalized at 0 min) are shown according to the scale (n=4 cells pooled across 2 independent experiments). Scale bars, 20 $\mu$ m.

**I:** Time-lapses of CFP/FRET ratio changes for the ROS FRET biosensor (HSP) normalized at 0 min, for the glutamate release illustrated in Fig. 3G shown according to the scale (n=4 cells pooled across 2 independent experiments).

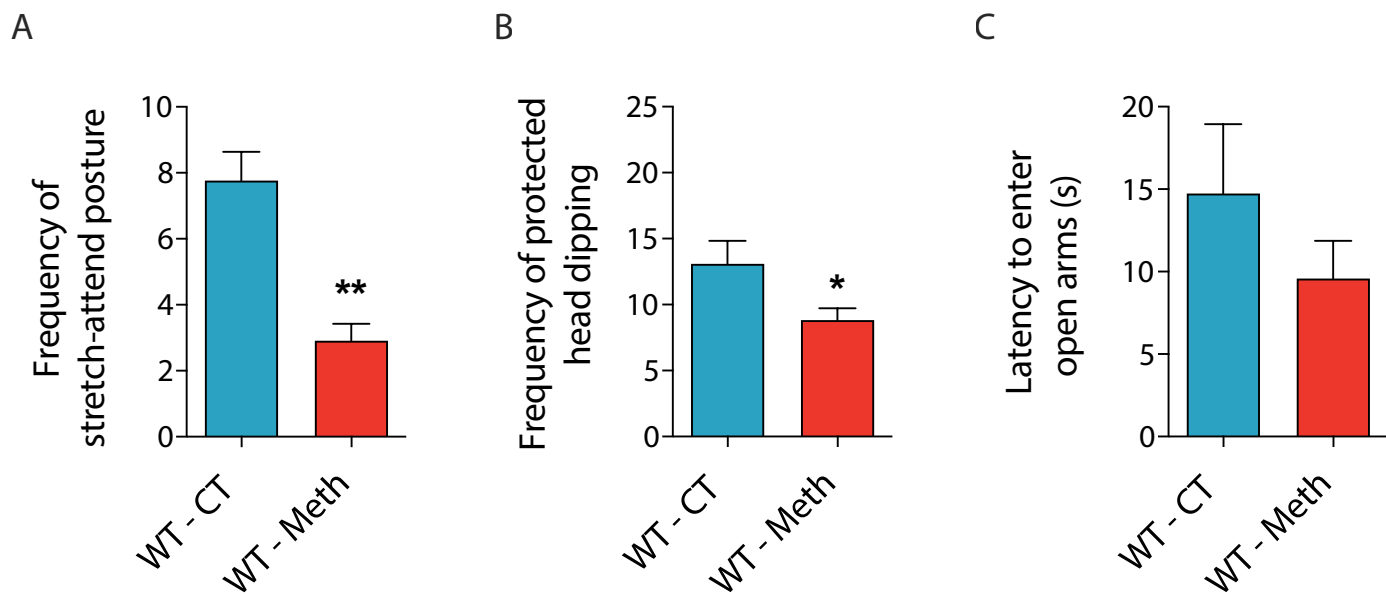

Suppl. Fig. 5

### Supplementary Figure 5.

**A:** WT animals were evaluated in the EPM 24 hours after being administered with saline (CT) or binge Meth (n=11-13 animals *per* group). CT and Meth-treated mice displayed significant differences in the frequency of stretch-attend postures (SAP). The graph displays the mean and SEM. \*\* $p < 0.01$  (unpaired t test).

**B:** WT animals were evaluated in the EPM 24 hours after being administered with saline (CT) or binge Meth (n=11-13 animals *per* group). CT and Meth-treated mice displayed significant differences in the frequency of protected head dipping. The graph displays the mean and SEM. \* $p < 0.05$  (unpaired t test).

**C:** WT animals were evaluated in the EPM 24 hours after being administered with saline (CT) or binge Meth (n=11-13 animals *per* group). CT and Meth-treated mice displayed no differences regarding the latency to enter in open arms. The graph displays the mean and SEM.

### 3. Supplementary tables

**Supplementary Table 4.** Antibodies used for immunohistochemistry

| <b>Antibody</b>              | <b>Dilution</b> | <b>Company</b>              |
|------------------------------|-----------------|-----------------------------|
| <b>CD68</b>                  | 1:500           | Abcam (CAM, UK)             |
| <b>GFAP</b>                  | 1:500           | Abcam (CAM, UK)             |
| <b>Iba-1</b>                 | 1:500           | Wako (CA, USA)              |
| <b>TNF</b>                   | 1:500           | Peprotech (LND, UK)         |
| <b>Anti-mouse Alexa 488</b>  | 1:1000          | Life Technologies (CA, USA) |
| <b>Anti-rabbit Alexa 568</b> | 1:1000          | Life Technologies (CA, USA) |

**Supplementary Table 5.** Antibodies used for immunocytochemistry

| <b>Antibody</b>              | <b>Dilution</b> | <b>Company</b>                     |
|------------------------------|-----------------|------------------------------------|
| <b>Arginase 1</b>            | 1:100           | Santa Cruz Biotechnology (TX, USA) |
| <b>CD11b</b>                 | 1:200           | Abcam (CAM, UK)                    |
| <b>CD68</b>                  | 1:200           | Bio-Rad (CA, USA)                  |
| <b>iNOS</b>                  | 1:200           | Santa Cruz Biotechnology (TX, USA) |
| <b>Anti-mouse Alexa 488</b>  | 1:1000          | Life Technologies (CA, USA)        |
| <b>Anti-rabbit Alexa 568</b> | 1:1000          | Life Technologies (CA, USA)        |



**Supplementary Table 6.** Primer sequences used in qRT-PCR

| <b>Primer</b>                       | <b>Forward (5' - 3')</b> | <b>Reverse (5' - 3')</b> |
|-------------------------------------|--------------------------|--------------------------|
| <b>IL-10 (Rat)</b>                  | ATCCGGGGTGACAATAACTG     | TGTCCAGCTGGTCCTTCTTT     |
| <b>IL-1<math>\beta</math> (Ms)</b>  | GCCCATCCTCTGTGACTCAT     | AGGCCACAGGTATTTTGTCTG    |
| <b>IL-1<math>\beta</math> (Rat)</b> | TAAGCCAACAAGTGGTATTC     | AGGTATAGATTCTTCCCCTTG    |
| <b>IL-6 (Ms)</b>                    | CACAAGTCCGGAGAGGAGAC     | CAGAATTGCCATTGCACAAC     |
| <b>IL-6 (Rat)</b>                   | ACTCATCTTGAAAGCACTTG     | GTCCACAAACTGATATGCTTAG   |
| <b>iNOS (Rat)</b>                   | AGCCGTAACAAAGGAAATAG     | ATGCTGGAACATTTCTGATG     |
| <b>S18 (Ms)</b>                     | GCCATTAAGGGCGTGGGG       | GTGATCACTCGCTCCACCTC     |
| <b>TGF-<math>\beta</math> (Rat)</b> | TGAGTGGCTGTCTTTTGACG     | GTTTGGGACTGATCCCATTG     |
| <b>TNF (Ms)</b>                     | GCCACCACGCTCTTCCTGTCT    | TGAGGGTCTGGGCCATAGAAC    |
| <b>TNF (Rat)</b>                    | CTCACACTCAGATCATCTTC     | GAGAACCTGGGAGTAGATAAG    |
| <b>Ywhaz (Rat)</b>                  | GATGAAGCCATTGCTGAACTTG   | GTCTCCTTGGGTATCCGATGTC   |

**Supplementary Table 7: Genes overlapping between published gene sets and enriched genes in microglia Meth vs Saline**

| Cluster analysed                                                                                                                    | Reference              | Total number of genes compared | Intersection | Fisher's exact test (p value) | Odds ratio | Intersection genes                                                                                                        |
|-------------------------------------------------------------------------------------------------------------------------------------|------------------------|--------------------------------|--------------|-------------------------------|------------|---------------------------------------------------------------------------------------------------------------------------|
| Genes enriched in microglia based on Genearray analysis.                                                                            | Butovsky, 2013 [85]    | 1572                           | 18           | 0.2045                        | 1.328      | Srl; Ears2; Zfp846; Urgcp; Gpr146; Pstk; Slc1a4; Tspan31; St6gal1; Pam; Cor2; Smo; Mras; Mtap; E2f5; Slc7a6; Procr; Vipr1 |
| Enriched microglia and monocyte proteins identified by TMT-based quantitative proteomic analysis                                    | Butovsky, 2013 [85]    | 455                            | 4            | 0.8                           | 1.017      | Mtap; Rxrg; Slc4a2; Nop56                                                                                                 |
| Enriched monocyte proteins identified by TMT-based quantitative proteomic analysis                                                  | Butovsky, 2013 [85]    | 926                            | 8            | 0.9999                        | 0.999      | Hmha1; Crot; Iars2; Nadk; Srp68; Ranbp1; Fxyd5; Lgals1                                                                    |
| Unique microglial proteins detected by TMT-based Mass spec                                                                          | Butovsky, 2013 [85]    | 74                             | 1            | 0.4747                        | 1.57       | Slc4a2                                                                                                                    |
| Microglial proteins detected by both TMT-based Mass spec and Gene Array                                                             | Butovsky, 2013 [85]    | 64                             | 1            | 0.4269                        | 1.819      | Mtap                                                                                                                      |
| Microglial genes identified by Affymetrix genearray                                                                                 | Butovsky, 2013 [85]    | 400                            | 4            | 0.7807                        | 1.161      | Tlr6; Agmo; Mras; Slc4a2;                                                                                                 |
| Microglial genes highly expressed and/or affected in different neuroinflammatory conditions detected by Nanostring Inflammation kit | Butovsky, 2013 [85]    | 46                             | 1            | 0.3238                        | 2.613      | Tlr6                                                                                                                      |
| Microglia not expressed in other immune cells                                                                                       | Butovsky, 2013 [85]    | 239                            | 1            | 0.7272                        | 0.4791     | Tlr6                                                                                                                      |
| Enriched in both microglia and organ macrophage                                                                                     | Butovsky, 2013 [85]    | 81                             | 0            | 0.9999                        | 0          |                                                                                                                           |
| Adult cluster 1a (P100)                                                                                                             | Hammond, 2019 [86]     | 23                             | 1            | 0.1883                        | 5.002      | Lpl                                                                                                                       |
| Adult cluster 1b (P100)                                                                                                             | Hammond, 2019 [86]     | 12                             | 0            | 0.9999                        | 0          |                                                                                                                           |
| Aging Cluster 2(AO) (P540)                                                                                                          | Hammond, 2019 [86]     | 136                            | 4            | 0.0336                        | 3.419      | Lpl; Nfkbia; Fxyd5; Hmha1                                                                                                 |
| Aging Cluster 3(AO) (P540)                                                                                                          | Hammond, 2019 [86]     | 37                             | 0            | 0.9999                        | 0          |                                                                                                                           |
| Aging Cluster MO (P540)                                                                                                             | Hammond, 2019 [86]     | 288                            | 3            | 0.741                         | 1.21       | Cd36; Fxyd5; Lgals1                                                                                                       |
| Injury cluster 1 (saline injected myelin)                                                                                           | Hammond, 2019 [86]     | 201                            | 1            | 0.9999                        | 0.571      | Lpl                                                                                                                       |
| Injury cluster 2 (LPC injected myelin)                                                                                              | Hammond, 2019 [86]     | 197                            | 1            | 0.9999                        | 0.5827     | Lpl                                                                                                                       |
| DAM microglia (AD)                                                                                                                  | Karen-Shaul, 2017 [87] | 102                            | 1            | 0.5885                        | 1.135      | Lpl                                                                                                                       |
| Microglia enriched genes                                                                                                            | Ayata, 2018 [84]       | 885                            | 6            | 0.7098                        | 0.7934     | Tlr6; Cdr1; Hmha1; Neur3; CD36; Lpl                                                                                       |
| Top 250 equally expressed in striatum and cerebellum                                                                                | Ayata, 2018 [84]       | 250                            | 4            | 0.1716                        | 1.881      | St6gal1; Papd4; Gpbb111; Nadk                                                                                             |
| Enriched in cerebellum microglia                                                                                                    | Ayata, 2018 [84]       | 297                            | 5            | 0.116                         | 1.987      | Zcchc3; Ubox5; Traf3ip1; Ccnd3; Fxyd5                                                                                     |
| Enriched in striatum microglia                                                                                                      | Ayata, 2018 [84]       | 733                            | 8            | 0.4202                        | 1.276      | Rin2; Srl; 9130023H24Rik; Hmha1; Neur3; Ccr2; Agmo; Mtap                                                                  |
| Top 50 genes in microglia                                                                                                           | Ayata, 2018 [84]       | 50                             | 0            | 0.9999                        | 0          |                                                                                                                           |
| Engulfment Cluster                                                                                                                  | Ayata, 2018 [84]       | 48                             | 0            | 0.9999                        | 0          |                                                                                                                           |
| Catabolism Cluster                                                                                                                  | Ayata, 2018 [84]       | 45                             | 1            | 0.3238                        | 2.613      | Ubox5                                                                                                                     |
| Transcription cluster                                                                                                               | Ayata, 2018 [84]       | 47                             | 1            | 0.3355                        | 2.499      | Zcchc3                                                                                                                    |
| Chromatin modification cluster                                                                                                      | Ayata, 2018 [84]       | 13                             | 0            | 0.9999                        | 0          |                                                                                                                           |
| Altered genes in microglia after acute cocaine                                                                                      | Savell, 2020 [89]      | 13                             | 0            | 0.9999                        | 0          |                                                                                                                           |
| Long term (23 w) Meth altered genes in macaques microglia                                                                           | Najera, 2016 [88]      | 957                            | 7            | 0.8577                        | 0.8393     | Pde6d; Prss16; Srm; Shmt1; Plekhg4; Lgals1; Mcm5                                                                          |
| HIV altered genes in macaques microglia                                                                                             | Najera, 2016 [88]      | 1932                           | 0            | 0.9999                        | 0          |                                                                                                                           |

#### 4. Supplementary references

- 81 Liao Y, Wang J, Jaehnig EJ, Shi Z, Zhang B. WebGestalt 2019: gene set analysis toolkit with revamped UIs and APIs. *Nucleic Acids Research*. 2019;47(W1):W199-W205.
- 82 Legeay M, Doncheva NT, Morris JH, Jensen LJ. Visualize omics data on networks with Omics Visualizer, a Cytoscape App. *F1000Res*. 2020;9:157.
- 83 Doncheva NT, Morris JH, Gorodkin J, Jensen LJ. Cytoscape StringApp: Network Analysis and Visualization of Proteomics Data. *J Proteome Res*. 2019;18(2):623-32.
- 84 Ayata P, Badimon A, Strasburger HJ, Duff MK, Montgomery SE, Loh Y-HE, et al. Epigenetic regulation of brain region-specific microglia clearance activity. *Nat Neurosci*. 2018;21(8):1049-60.
- 85 Butovsky O, Jedrychowski MP, Moore CS, Cialic R, Lanser AJ, Gabriely G, et al. Identification of a unique TGF- $\beta$ -dependent molecular and functional signature in microglia. *Nat Neurosci*. 2014;17(1):131-43.
- 86 Hammond TR, Dufort C, Dissing-Olesen L, Giera S, Young A, Wysoker A, et al. Single-Cell RNA Sequencing of Microglia throughout the Mouse Lifespan and in the Injured Brain Reveals Complex Cell-State Changes. *Immunity*. 2019;50(1):253-71.e6.
- 87 Keren-Shaul H, Spinrad A, Weiner A, Matcovitch-Natan O, Dvir-Szternfeld R, Ulland TK, et al. A Unique Microglia Type Associated with Restricting Development of Alzheimer's Disease. *Cell*. 2017;169(7):1276-90.e17.
- 88 Najera JA, Bustamante EA, Bortell N, Morsey B, Fox HS, Ravasi T, et al. Methamphetamine abuse affects gene expression in brain-derived microglia of SIV-infected macaques to enhance inflammation and promote virus targets. *BMC Immunol*. 2016;17(1):7-7.
- 89 Savell KE, Tuscher JJ, Zipperly ME, Duke CG, Phillips RA, Bauman AJ, et al. A dopamine-induced gene expression signature regulates neuronal function and cocaine response. *Sci Adv* 2020;6(26):eaba4221.
